# Supplementary material
Source: Springer Nature journal article supplement (https://www.springermedizin.de/resource/supplementary/12957_2013_1408_MOESM3_ESM.pdf/9562532)

Cervix

Left

Vagina

„Ridge“ of  
ligamentous  
mesometrium  
(sacrouterine fold)

Rectum

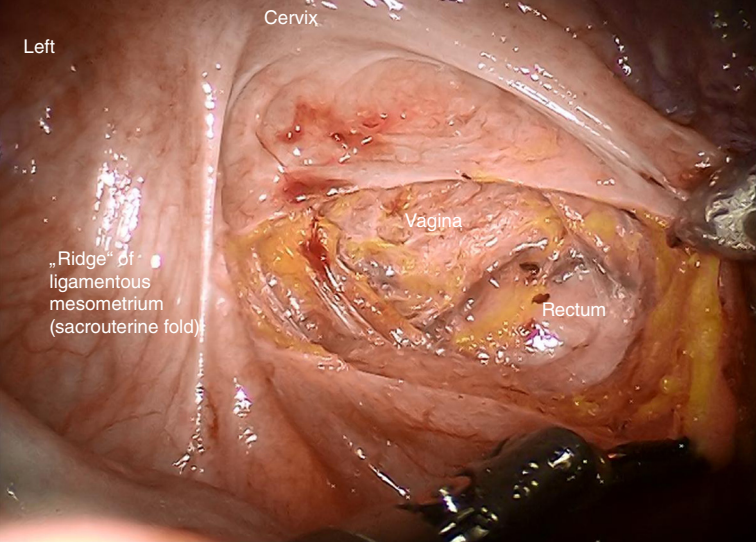

Supplement: MOESM3 [file 9562532]
